# Supplementary material
Source: Springer Nature journal article supplement (https://www.springermedizin.de/resource/supplementary/13048_2013_236_MOESM5_ESM.pdf/9665192)

Additional fig.4 cell viability in HOC-7 ovarian cancer cells

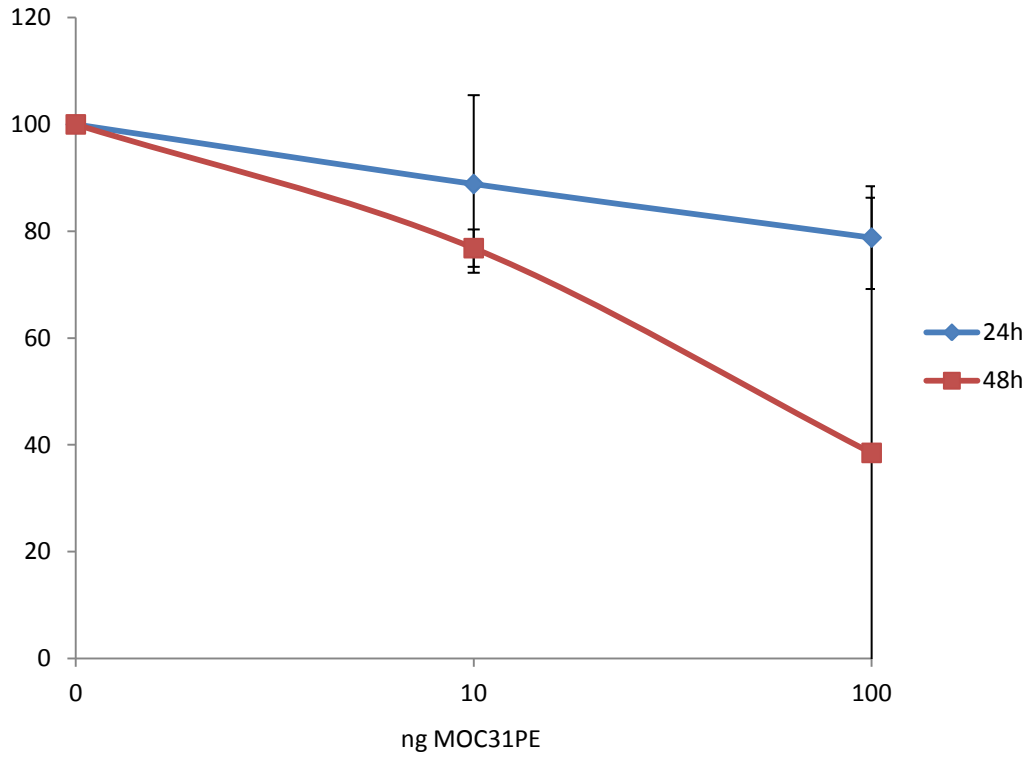

Supplement: MOESM5 [file 9665192]
